# Supplementary material
Source: PubMed Central journal article supplement (PMC2752416)
Supplement: NIHMS127063-supplement-suppl5.pdf [file NIHMS127063-supplement-suppl5.pdf]

| GeneID | Symbol    | Description                                                                                                                                                                                                          | Molecular function                                                                              | Biological process                                                                                                                                                                                                                                                                                                                                                                                                                                                                                                                                                                                                                                                                                                                                                                                                                                                                  | KEGG pathway                                                                                                                                                                                                                                                                                                | Cytosol | Plasma membrane | Mitochondria | Mitochondrial matrix | Mitochondrial inner membrane | Mitochondrial outer membrane | Endoplasmic reticulum | Golgi | Endosome | Ribosome assoc. | Nucleus |   |   |
|--------|-----------|----------------------------------------------------------------------------------------------------------------------------------------------------------------------------------------------------------------------|-------------------------------------------------------------------------------------------------|-------------------------------------------------------------------------------------------------------------------------------------------------------------------------------------------------------------------------------------------------------------------------------------------------------------------------------------------------------------------------------------------------------------------------------------------------------------------------------------------------------------------------------------------------------------------------------------------------------------------------------------------------------------------------------------------------------------------------------------------------------------------------------------------------------------------------------------------------------------------------------------|-------------------------------------------------------------------------------------------------------------------------------------------------------------------------------------------------------------------------------------------------------------------------------------------------------------|---------|-----------------|--------------|----------------------|------------------------------|------------------------------|-----------------------|-------|----------|-----------------|---------|---|---|
| 596    | BCL2      | B-cell CLL/lymphoma 2                                                                                                                                                                                                | Signaling molecule                                                                              | Response to hypoxia; release of cytochrome c from mitochondria; anti-apoptosis; humoral immune response; female pregnancy; response to nutrient; positive regulation of cell proliferation; response to radiation; response to heat; response to heat shock; response to hypoxia; response to iron ion; response to caffeine; hair follicle morphogenesis; negative regulation of cellular pH reduction; response to nitrite; regulation of apoptosis; response to apoptosis; hormone stimulus; pigmentation; regulation of protein homeostasis; activity; regulation of protein homeostasis; activity; negative regulation of neuron apoptosis; response to antigen; stimulus; regulation of viral genome replication; response to ethanol; regulation of mitochondrial membrane potential; negative regulation of mitochondrial depolarization; inhibition of apoptosis; Oncogene | PATH: hsa01150 Neurodegenerative Diseases<br>PATH: hsa04210 Apoptosis<br>PATH: hsa05100 Focal adhesion<br>PATH: hsa05030 Amyotrophic lateral sclerosis (ALS)<br>PATH: hsa05060 Prion disease<br>PATH: hsa05212 Colorectal cancer<br>PATH: hsa05215 Prostate cancer<br>PATH: hsa05222 Small cell lung cancer | 1       |                 | 1            |                      |                              |                              |                       |       |          |                 |         |   | 1 |
| 596    | BCL2L1    | BCL2-like 1                                                                                                                                                                                                          | Signaling molecule                                                                              | Release of cytochrome c from mitochondria; anti-apoptosis; negative regulation of survival gene product activity; regulation of apoptosis; regulation of mitochondrial membrane permeability; regulation of mitochondrial membrane potential; induction of apoptosis; inhibition of apoptosis; Oncogene                                                                                                                                                                                                                                                                                                                                                                                                                                                                                                                                                                             | PATH: hsa01150 Neurodegenerative Diseases<br>PATH: hsa04210 Apoptosis<br>PATH: hsa04630 Jak-STAT signaling pathway<br>PATH: hsa05030 Amyotrophic lateral sclerosis (ALS)<br>PATH: hsa05212 Colorectal cancer<br>PATH: hsa05222 Small cell lung cancer                                                       | 1       |                 | 1            |                      |                              |                              |                       |       |          |                 |         | 1 |   |
| 7986   | C14orf139 | Chromosome 14 open reading frame 139                                                                                                                                                                                 | Molecular function unclassified                                                                 | Biological process unclassified                                                                                                                                                                                                                                                                                                                                                                                                                                                                                                                                                                                                                                                                                                                                                                                                                                                     |                                                                                                                                                                                                                                                                                                             | unknown |                 |              |                      |                              |                              |                       |       |          |                 |         |   |   |
| 7903   | C19orf50  | Chromosome 19 open reading frame 50                                                                                                                                                                                  | Molecular function unclassified                                                                 | Biological process unclassified                                                                                                                                                                                                                                                                                                                                                                                                                                                                                                                                                                                                                                                                                                                                                                                                                                                     |                                                                                                                                                                                                                                                                                                             | unknown |                 |              |                      |                              |                              |                       |       |          |                 |         |   |   |
| 1024   | CALCOOC2  | Calcium binding and coiled-coil domain 2                                                                                                                                                                             | Molecular function unclassified                                                                 | Viral reproduction                                                                                                                                                                                                                                                                                                                                                                                                                                                                                                                                                                                                                                                                                                                                                                                                                                                                  |                                                                                                                                                                                                                                                                                                             | 1       |                 |              |                      |                              |                              |                       |       |          |                 |         | 1 |   |
| 2224   | CDPS      | Formyl dihydrophosphate synthase (formyl dihydrophosphate synthetase, formyl dihydrophosphate synthase/transaminase, seranyltransferase)                                                                             | Synthetase; Acyltransferase                                                                     | Cholesterol biosynthetic process; isoprenoid biosynthetic process; Cholesterol metabolism; Other metabolism                                                                                                                                                                                                                                                                                                                                                                                                                                                                                                                                                                                                                                                                                                                                                                         | PATH: hsa00100 Biosynthesis of steroids<br>PATH: hsa09000 Terpenoid biosynthesis                                                                                                                                                                                                                            | 1       |                 |              |                      |                              |                              |                       |       |          |                 |         | 1 |   |
| 54874  | FNBP1L    | Feritin binding protein 1-like                                                                                                                                                                                       | Other signaling molecule; Cytoskeletal protein; Other mitochondrial function protein            | Endocytosis                                                                                                                                                                                                                                                                                                                                                                                                                                                                                                                                                                                                                                                                                                                                                                                                                                                                         |                                                                                                                                                                                                                                                                                                             | 1       | 1               |              |                      |                              |                              |                       |       |          |                 |         |   |   |
| 11337  | GABARAP   | GABA(A) receptor-associated protein                                                                                                                                                                                  | Non-motor microtubule binding protein                                                           | Microtubule cytoskeleton organization and biogenesis; protein targeting; synaptic transmission; protein transport; Cell structure and motility                                                                                                                                                                                                                                                                                                                                                                                                                                                                                                                                                                                                                                                                                                                                      | PATH: hsa04140 Regulation of autophagy                                                                                                                                                                                                                                                                      | 1       | 1               |              |                      |                              |                              |                       |       |          |                 |         | 1 |   |
| 11340  | GABARAPL2 | GABA(A) receptor-associated protein-like 2                                                                                                                                                                           | Non-motor microtubule binding protein                                                           | Cell structure and motility                                                                                                                                                                                                                                                                                                                                                                                                                                                                                                                                                                                                                                                                                                                                                                                                                                                         |                                                                                                                                                                                                                                                                                                             | 1       |                 |              |                      |                              |                              |                       |       |          |                 |         | 1 |   |
| 2593   | GAMT      | Guanidinoacetate N-methyltransferase                                                                                                                                                                                 | Methyltransferase activity; transferase activity; guanidinoacetate N-methyltransferase activity | Creatine biosynthetic process; muscle contraction; spermatogenesis; organ morphogenesis; regulation of multicellular organism growth                                                                                                                                                                                                                                                                                                                                                                                                                                                                                                                                                                                                                                                                                                                                                | PATH: hsa00280 Glycine, serine and threonine metabolism                                                                                                                                                                                                                                                     | 1       |                 |              |                      |                              |                              |                       |       |          |                 |         |   |   |
| 8328   | GF1B      | Growth factor independent 1B (potential regulator of CDKN1A, transcribed in CML)                                                                                                                                     | Zinc finger transcription factor                                                                | G1 specific transcription in mitotic cell cycle; cell cycle; cell proliferation; chromatin modification; multicellular organismal development; negative regulation of transcription from RNA polymerase II promoter; regulation of transcription; DNA-dependent transcription; mRNA transcription                                                                                                                                                                                                                                                                                                                                                                                                                                                                                                                                                                                   | PATH: hsa02080 Arginine and proline metabolism                                                                                                                                                                                                                                                              | 1       |                 |              |                      |                              |                              |                       |       |          |                 |         | 1 |   |
| 57120  | GPCPC     | GNP associated PDZ and coiled-coil motif containing                                                                                                                                                                  | Other transporter                                                                               | ER to Golgi vesicle-mediated transport; Golgi to plasma membrane transport; apical protein localization; cytoplasmic sequestration of CFTR protein; protein homeostasis; protein transport; intracellular protein traffic                                                                                                                                                                                                                                                                                                                                                                                                                                                                                                                                                                                                                                                           |                                                                                                                                                                                                                                                                                                             | 1       |                 |              |                      |                              |                              |                       |       |          |                 |         |   |   |
| 84078  | HTB707    | Heat shock and BTE (POZ) domain containing 7                                                                                                                                                                         | Molecular function unclassified                                                                 | Biological process unclassified                                                                                                                                                                                                                                                                                                                                                                                                                                                                                                                                                                                                                                                                                                                                                                                                                                                     |                                                                                                                                                                                                                                                                                                             | unknown |                 |              |                      |                              |                              |                       |       |          |                 |         |   |   |
| 83755  | HRTA4L12  | Heat shock associated protein 4-12                                                                                                                                                                                   | Intermediate filament; Structural protein                                                       | Cell structure                                                                                                                                                                                                                                                                                                                                                                                                                                                                                                                                                                                                                                                                                                                                                                                                                                                                      |                                                                                                                                                                                                                                                                                                             | 1       |                 |              |                      |                              |                              |                       |       |          |                 |         |   |   |
| 51633  | LCCL2     | LCCL2-like 2 (B. cereus)ase                                                                                                                                                                                          | Molecular function unclassified                                                                 | Biological process unclassified                                                                                                                                                                                                                                                                                                                                                                                                                                                                                                                                                                                                                                                                                                                                                                                                                                                     |                                                                                                                                                                                                                                                                                                             | unknown |                 |              |                      |                              |                              |                       |       |          |                 |         |   |   |
| 4188   | MDM1      | MyoD family inhibitor                                                                                                                                                                                                | Transcription factor                                                                            | Activation of JNK activity; cell differentiation; cytoplasmic sequestration of transcription factor; dermal/ventral area specification; embryonic development; negative regulation of DNA binding; negative regulation of Wnt receptor signaling pathway; negative regulation of transcription from RNA polymerase II promoter; mRNA transcription regulation; Embryogenesis                                                                                                                                                                                                                                                                                                                                                                                                                                                                                                        |                                                                                                                                                                                                                                                                                                             | 1       |                 |              |                      |                              |                              |                       |       |          |                 |         | 1 |   |
| 64210  | MM19L     | MM19-like (MET18 homolog, B. cereus)ase                                                                                                                                                                              | Transcription cofactor; Other nucleic acid binding                                              | Nucleotide excision repair; positive regulation of transcription; DNA-dependent response to hormone stimulus; transcription; two-component signal transduction system (phosphorelay); DNA repair; mRNA transcription regulation                                                                                                                                                                                                                                                                                                                                                                                                                                                                                                                                                                                                                                                     |                                                                                                                                                                                                                                                                                                             |         |                 |              |                      |                              |                              |                       |       |          |                 |         | 1 |   |
| 64965  | MRF55     | Mitochondrial ribosomal protein 55                                                                                                                                                                                   | Ribosomal protein                                                                               | translational; Protein biosynthesis                                                                                                                                                                                                                                                                                                                                                                                                                                                                                                                                                                                                                                                                                                                                                                                                                                                 |                                                                                                                                                                                                                                                                                                             |         |                 | 1            |                      |                              |                              |                       |       |          |                 |         | 1 |   |
| 43208  | MUP8      | Nucleoporin 88Da                                                                                                                                                                                                     | Other transporter                                                                               | DNA replication; intracellular protein transport across a membrane; mRNA transport; nuclear pore organization and biogenesis; nucleocytoplasmic transport; protein import into nucleus; docking; protein transport; RNA localization; Nuclear transport; Transport                                                                                                                                                                                                                                                                                                                                                                                                                                                                                                                                                                                                                  |                                                                                                                                                                                                                                                                                                             |         |                 |              |                      |                              |                              |                       |       |          |                 |         |   | 1 |
| 4967   | OGDH      | oxoglutarate (alpha-ketoglutarate) dehydrogenase (cytosolic)                                                                                                                                                         | Dehydrogenase                                                                                   | Generation of precursor metabolites and energy; glycolysis; metabolic process; Tricarboxylic acid pathway                                                                                                                                                                                                                                                                                                                                                                                                                                                                                                                                                                                                                                                                                                                                                                           | PATH: hsa00020 Citrate cycle (TCA cycle)<br>PATH: hsa05100 Lysine degradation<br>PATH: hsa02080 Tyrosine metabolism                                                                                                                                                                                         | 1       |                 | 1            | 1                    | 1                            |                              |                       |       |          |                 |         | 1 |   |
| 4688   | OPRK1     | Opoid receptor, kappa 1                                                                                                                                                                                              | G-protein coupled receptor                                                                      | G-protein coupled receptor protein signaling pathway; G-protein signaling; adenylate cyclase inhibiting pathway; behavior; immune response; sensory perception; signal transduction; synaptic transmission; viral genome replication; G-protein mediated signaling; synaptic transmission; Pain sensation                                                                                                                                                                                                                                                                                                                                                                                                                                                                                                                                                                           | PATH: hsa09000 Neuroactive ligand-receptor interaction                                                                                                                                                                                                                                                      |         | 1               |              |                      |                              |                              |                       |       |          |                 |         |   |   |
| 5306   | PLSCR1    | phospholipid scramblase 1                                                                                                                                                                                            | Other transfer/carrier protein                                                                  | Phospholipid scrambling; platelet activation; response to virus; lipid and fatty acid transport; Phospholipid metabolism; Transport; Blood clotting                                                                                                                                                                                                                                                                                                                                                                                                                                                                                                                                                                                                                                                                                                                                 |                                                                                                                                                                                                                                                                                                             |         | 1               |              |                      |                              |                              |                       |       |          |                 |         |   |   |
| 23203  | PMPCA     | peptidase (mitochondrial processing) 8Da                                                                                                                                                                             | Reductase; Esterase; Metalloprotease                                                            | Proteolysis; Electron transport                                                                                                                                                                                                                                                                                                                                                                                                                                                                                                                                                                                                                                                                                                                                                                                                                                                     |                                                                                                                                                                                                                                                                                                             | 1       | 1               | 1            | 1                    | 1                            |                              |                       |       |          |                 |         |   |   |
| 9512   | PMPCB     | peptidase (mitochondrial processing) 8Da                                                                                                                                                                             | Reductase; Metalloprotease                                                                      | Proteolysis; Electron transport                                                                                                                                                                                                                                                                                                                                                                                                                                                                                                                                                                                                                                                                                                                                                                                                                                                     |                                                                                                                                                                                                                                                                                                             | 1       | 1               | 1            | 1                    | 1                            |                              |                       |       |          |                 |         |   |   |
| 5708   | PSMD2     | proteasome (prosome, multicatalytic proteinase) 20S subunit, non-ATPase_2                                                                                                                                            | Other enzyme regulator                                                                          | Proteolysis; Cell cycle control                                                                                                                                                                                                                                                                                                                                                                                                                                                                                                                                                                                                                                                                                                                                                                                                                                                     | PATH: hsa03050 Proteasoma                                                                                                                                                                                                                                                                                   | 1       |                 |              |                      |                              |                              |                       |       |          |                 |         |   |   |
| 5747   | PTK2      | PTK2 protein tyrosine kinase 2                                                                                                                                                                                       | Non-receptor tyrosine protein kinase                                                            | Insulin-mediated signaling pathway; protein serine/acid phosphatase/catalytic complex assembly; Protein phosphorylation; intracellular signaling cascade; Stress response; Developmental processes; Cell proliferation and differentiation                                                                                                                                                                                                                                                                                                                                                                                                                                                                                                                                                                                                                                          | PATH: hsa04010 ErbB signaling pathway<br>PATH: hsa04360 Axon guidance<br>PATH: hsa04370 VEGF signaling pathway<br>PATH: hsa05100 Focal adhesion<br>PATH: hsa04670 Leukocyte transendothelial migration<br>PATH: hsa05100 Regulation of actin cytoskeleton<br>PATH: hsa05222 Small cell lung cancer          |         |                 |              |                      |                              |                              |                       |       |          |                 |         | 1 |   |
| 5810   | RAD1      | RAD1 homolog (S. pombe)                                                                                                                                                                                              | Endonuclease/nucleoside hydrolase                                                               | DNA damage checkpoint; DNA repair; cell cycle checkpoint; meiotic prophase I; DNA repair; DNA recombination; Cell cycle control                                                                                                                                                                                                                                                                                                                                                                                                                                                                                                                                                                                                                                                                                                                                                     |                                                                                                                                                                                                                                                                                                             |         |                 |              |                      |                              |                              |                       |       |          |                 |         |   | 1 |
| 788    | SLC25A20  | soluble carrier family 25 (anion/cation/carnitine transporters), member 20                                                                                                                                           | Transporter; Mitochondrial carrier protein                                                      | Lipid and fatty acid transport; Transport                                                                                                                                                                                                                                                                                                                                                                                                                                                                                                                                                                                                                                                                                                                                                                                                                                           |                                                                                                                                                                                                                                                                                                             |         |                 | 1            |                      |                              |                              |                       |       |          |                 |         |   | 1 |
| 8678   | SG11M1    | SH2 domain binding; SH2 domain binding; metal ion binding; protein binding; protein kinase binding; protein kinase binding; receptor tyrosine kinase binding; ubiquitin binding; ubiquitin binding; zinc ion binding |                                                                                                 | Apoptosis; cell differentiation; endosome transport; immune response; intracellular signaling cascade; positive regulation of transcription from RNA polymerase II promoter; protein localization; tyrosine phosphorylation; regulation of I kappa B kinase/NF-kappa B cascade; response to stress; ubiquitin-dependent protein catabolic process; Protein metabolism and modification; T cell mediated immunity                                                                                                                                                                                                                                                                                                                                                                                                                                                                    |                                                                                                                                                                                                                                                                                                             | 1       |                 |              |                      |                              |                              |                       |       |          |                 |         |   | 1 |
| 6804   | STX1A     | syntaxin 1A (brain)                                                                                                                                                                                                  | SNARE protein                                                                                   | Exocytosis; intracellular protein transport; neurotransmitter transport; regulation of insulin secretion; synaptic transmission; vesicle-mediated transport; Regulated exocytosis; Protein targeting; Small molecule transport; Synaptic transmission                                                                                                                                                                                                                                                                                                                                                                                                                                                                                                                                                                                                                               | PATH: hsa01300 SNARE interactions in vesicular transport<br>PATH: hsa02080 Parkinson's disease                                                                                                                                                                                                              | 1       | 1               |              |                      |                              |                              |                       |       |          |                 |         |   |   |
| 28384  | TNPO3     | transposon 3                                                                                                                                                                                                         | Transposon                                                                                      | DNA localization; Nuclear transport                                                                                                                                                                                                                                                                                                                                                                                                                                                                                                                                                                                                                                                                                                                                                                                                                                                 |                                                                                                                                                                                                                                                                                                             | 1       |                 |              |                      |                              |                              |                       |       |          |                 |         |   | 1 |
| 2810   | TRPC2     | TRPC2 regulator of nonvoltage-activated channels (yeast)                                                                                                                                                             | Nucleoside                                                                                      | RNA metabolic process; mRNA cellular process; hormone-mediated decay; mRNA export from nucleus; Protein biosynthesis; Other metabolism                                                                                                                                                                                                                                                                                                                                                                                                                                                                                                                                                                                                                                                                                                                                              |                                                                                                                                                                                                                                                                                                             | 1       |                 |              |                      |                              |                              |                       |       |          |                 |         |   | 1 |
| 7514   | YPO1      | yeast YPO1 (CRM1 homolog, yeast)                                                                                                                                                                                     | RNA binding; protein transporter activity                                                       | Intracellular protein transport; mRNA transport; protein import into nucleus; coding; response to virus                                                                                                                                                                                                                                                                                                                                                                                                                                                                                                                                                                                                                                                                                                                                                                             |                                                                                                                                                                                                                                                                                                             | 1       |                 |              |                      |                              |                              |                       |       |          |                 |         |   | 1 |
