# Supplementary material
Source: PubMed Central journal article supplement (PMC2752416)

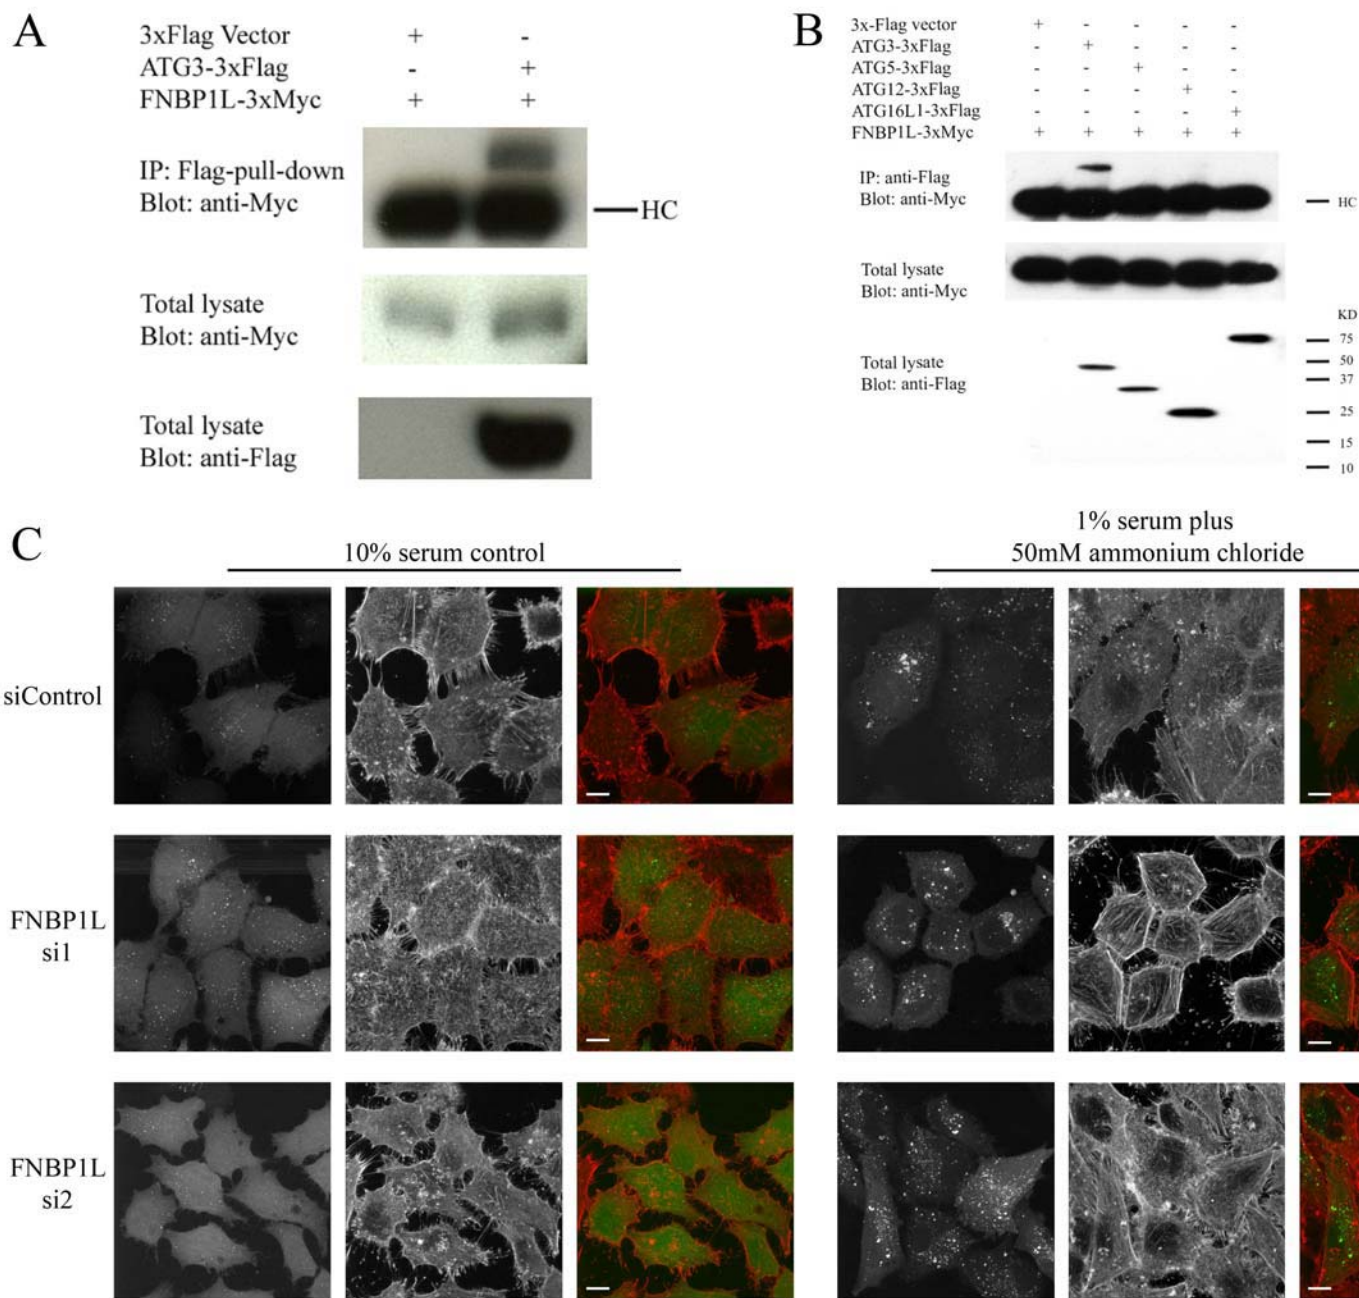

Figure S2

Supplement: NIHMS127063-supplement-suppl3.pdf [file NIHMS127063-supplement-suppl3.pdf]

# Figure S3

A

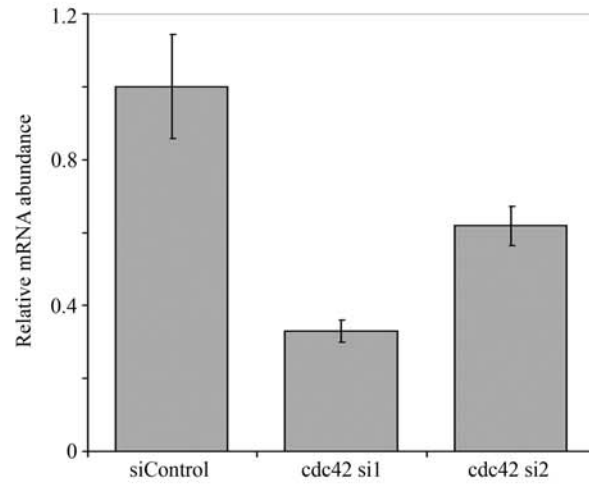

B

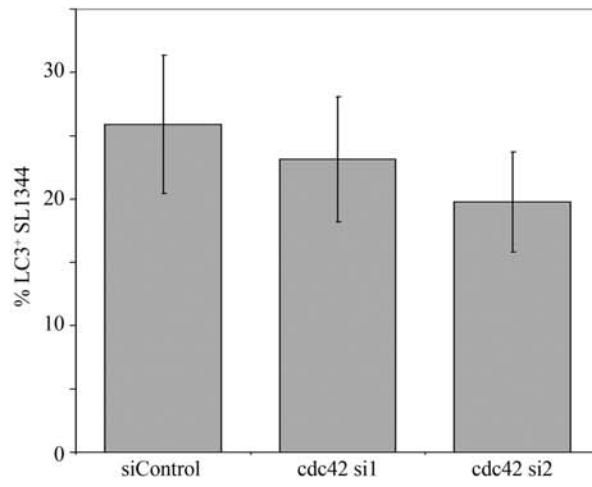

C

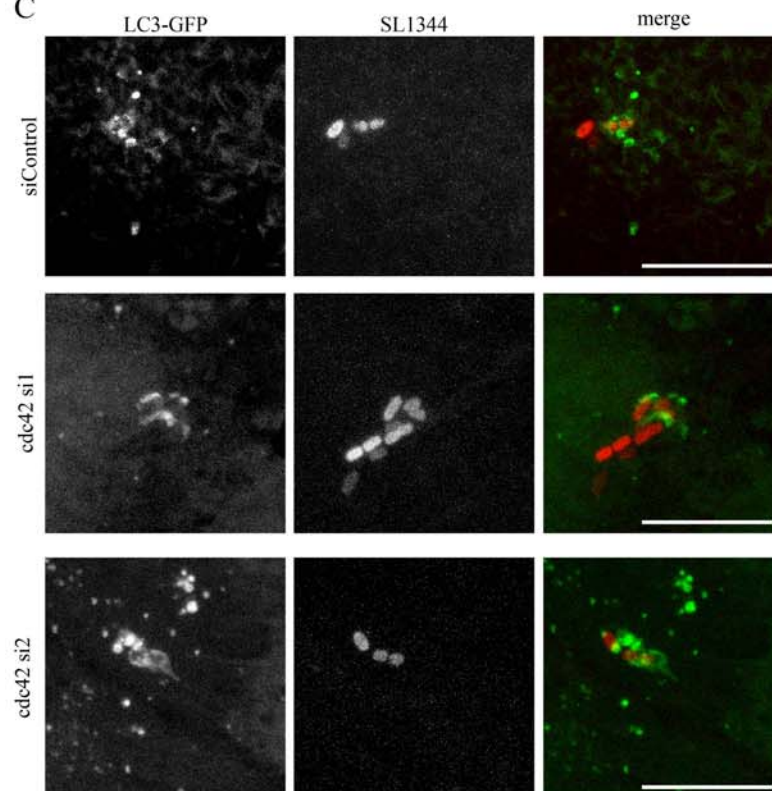

Supplement: NIHMS127063-supplement-suppl4.pdf [file NIHMS127063-supplement-suppl4.pdf]
